# Supplementary material for: HPV E6/E7 promotes aerobic glycolysis in cervical cancer by regulating IGF2BP2 to stabilize m6A-MYC expression
Source: PubMed Central journal article supplement (PMC8741847; doi:10.7150/ijbs.67770), 2022-01-01
Supplement: ijbsv18p0507s1.pdf [file ijbsv18p0507s1.pdf]

## ***Supplementary Figure***

**Figure S1.** (A) Statistics for GO enrichment analysis. (B) The expression of IGF2BP2 and MYC in human CC tissues and adjacent normal tissues ( $n=186$ ). (C) Detection of IGF2BP2 and MYC protein expression in human CC tissues ( $n=24$ ).

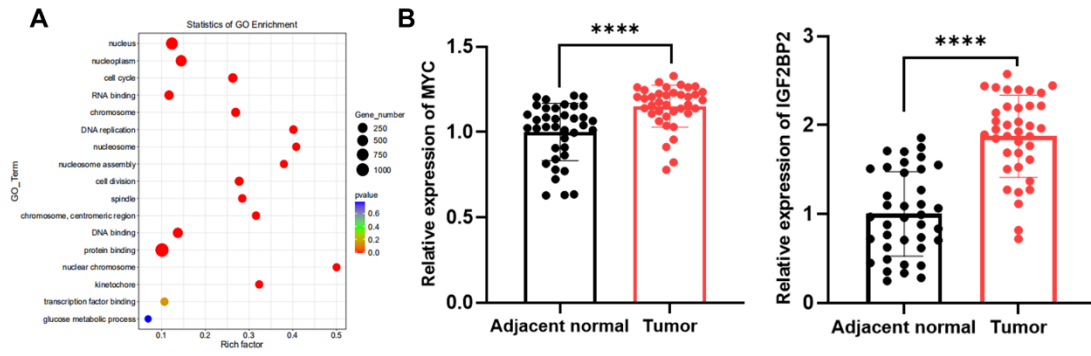

**C**

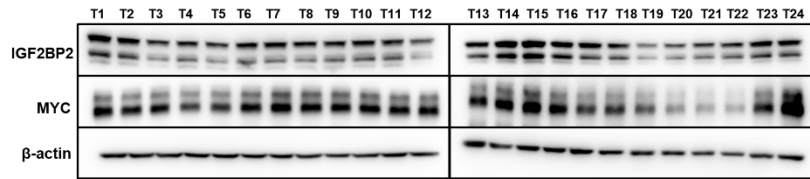

**Figure S2. The effect of HPV16/18 E6/E7 and IGF2BP2 on cell apoptosis.** (A) Flow cytometry was used to detect cell apoptosis in SiHa and HeLa cells transfected with HPV16/18 E6/E7-targeting siRNA. (B) Flow cytometry was used to detect cell apoptosis in SiHa and HeLa cells transfected with IGF2BP2 siRNA. (C) Flow cytometry was used to detect cell apoptosis in HeLa cells transfected with different siRNAs and plasmids.

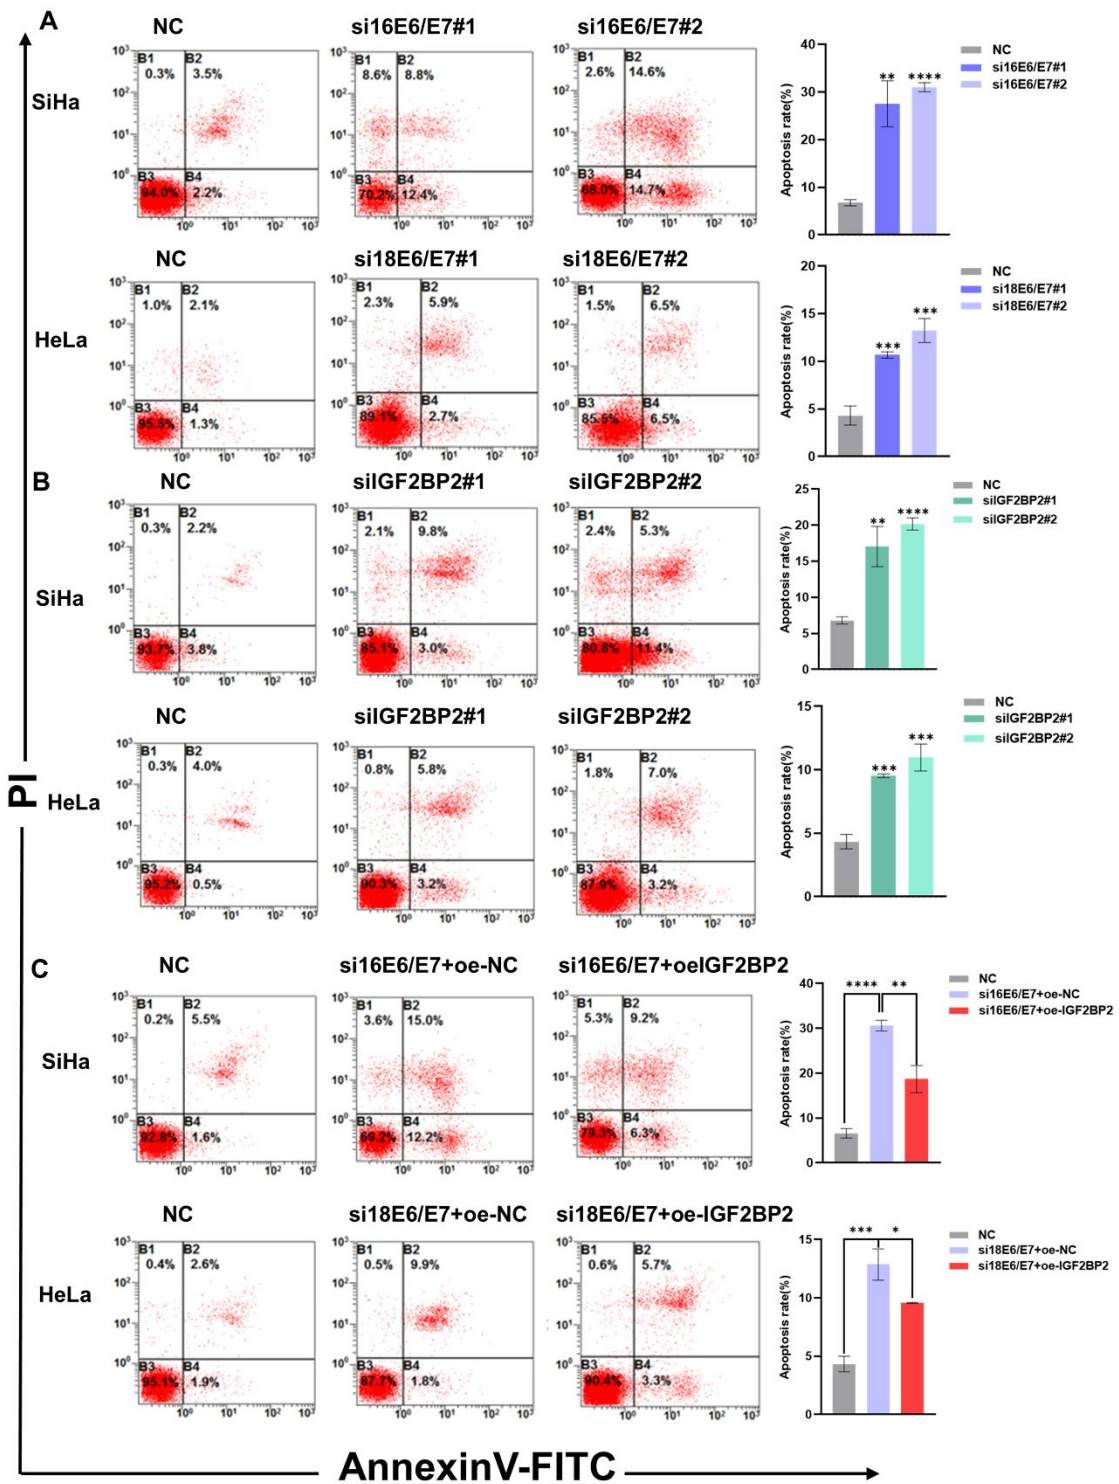

**Figure S3. The effect of HPV16/18 E6/E7 and IGF2BP2 on the cell cycle.** (A) The cell cycle in SiHa and HeLa cells transfected with HPV16/18 E6/E7-targeting siRNA was evaluated by propidium iodide (PI) staining using flow cytometry. (B) Flow cytometry was used to detect the cell cycle in SiHa and HeLa cells transfected with IGF2BP2 siRNA. (B) The cell cycle in SiHa and HeLa cells transfected with different siRNAs and plasmids was examined by PI staining using flow cytometry.

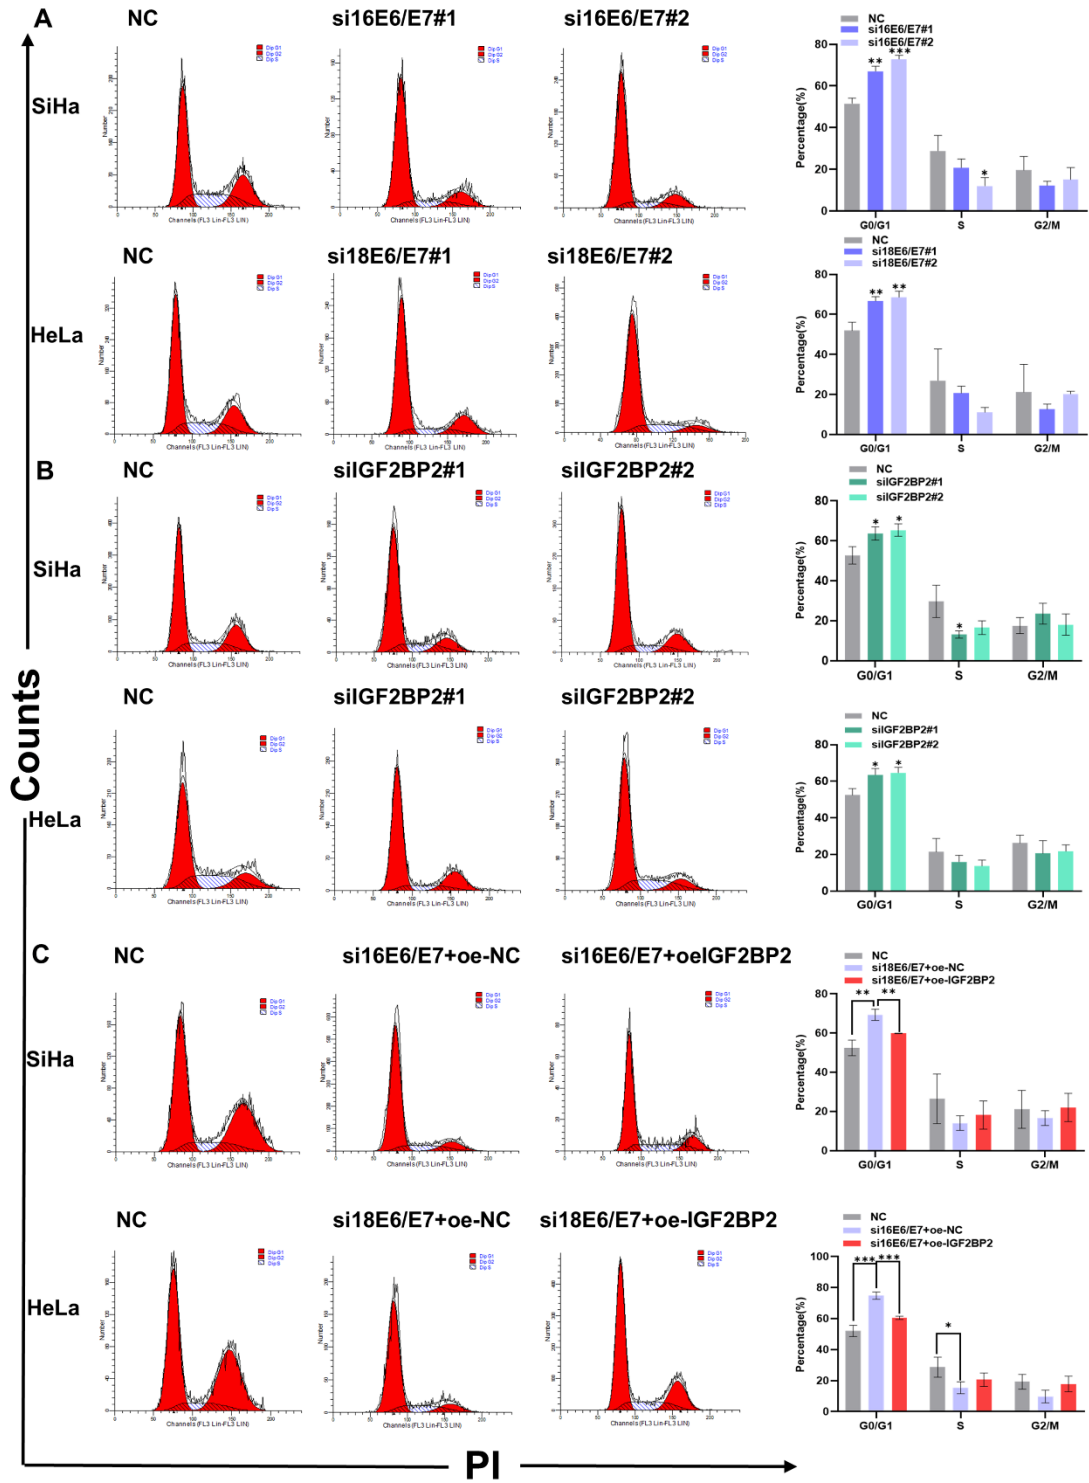

## *Supplementary Material*

**Supplementary Table 1 The sequences of siRNAs, shRNAs and plasmids**

| Plasmids            | sequences (5' > 3')                                                                                                                                                                                                                                                                                                                                                                                                                                                                                                                                                                                                                                                                                                                                                                                                                                                                                                                                                                                                                                                                                                                                                                                                                                                                                                                                                                                                                                                                                                                                                                                                                                                                                                                                                                                                                                          |
|---------------------|--------------------------------------------------------------------------------------------------------------------------------------------------------------------------------------------------------------------------------------------------------------------------------------------------------------------------------------------------------------------------------------------------------------------------------------------------------------------------------------------------------------------------------------------------------------------------------------------------------------------------------------------------------------------------------------------------------------------------------------------------------------------------------------------------------------------------------------------------------------------------------------------------------------------------------------------------------------------------------------------------------------------------------------------------------------------------------------------------------------------------------------------------------------------------------------------------------------------------------------------------------------------------------------------------------------------------------------------------------------------------------------------------------------------------------------------------------------------------------------------------------------------------------------------------------------------------------------------------------------------------------------------------------------------------------------------------------------------------------------------------------------------------------------------------------------------------------------------------------------|
| si/shHPV16E6/E7#1   | CCGGACAGAGCCCAUUACATT                                                                                                                                                                                                                                                                                                                                                                                                                                                                                                                                                                                                                                                                                                                                                                                                                                                                                                                                                                                                                                                                                                                                                                                                                                                                                                                                                                                                                                                                                                                                                                                                                                                                                                                                                                                                                                        |
| siHPV16E6/E7#2      | CAACUGAUCUCUACUGUUATT                                                                                                                                                                                                                                                                                                                                                                                                                                                                                                                                                                                                                                                                                                                                                                                                                                                                                                                                                                                                                                                                                                                                                                                                                                                                                                                                                                                                                                                                                                                                                                                                                                                                                                                                                                                                                                        |
| si/shHPV18E6/E7#1   | CCACAACGUCACACAAUGUTT                                                                                                                                                                                                                                                                                                                                                                                                                                                                                                                                                                                                                                                                                                                                                                                                                                                                                                                                                                                                                                                                                                                                                                                                                                                                                                                                                                                                                                                                                                                                                                                                                                                                                                                                                                                                                                        |
| siHPV18E6/E7#2      | UCCAGCAGCUGUUUCUGAATT                                                                                                                                                                                                                                                                                                                                                                                                                                                                                                                                                                                                                                                                                                                                                                                                                                                                                                                                                                                                                                                                                                                                                                                                                                                                                                                                                                                                                                                                                                                                                                                                                                                                                                                                                                                                                                        |
| si/shIGF2BP2#1      | AGTGAAGCTGGAAGCGCATAT                                                                                                                                                                                                                                                                                                                                                                                                                                                                                                                                                                                                                                                                                                                                                                                                                                                                                                                                                                                                                                                                                                                                                                                                                                                                                                                                                                                                                                                                                                                                                                                                                                                                                                                                                                                                                                        |
| siIGF2BP2#2         | TTCCCGCATCATCACTCTTAT                                                                                                                                                                                                                                                                                                                                                                                                                                                                                                                                                                                                                                                                                                                                                                                                                                                                                                                                                                                                                                                                                                                                                                                                                                                                                                                                                                                                                                                                                                                                                                                                                                                                                                                                                                                                                                        |
| siMETTL14#1         | GCTGGACTTGGGATGATATTA                                                                                                                                                                                                                                                                                                                                                                                                                                                                                                                                                                                                                                                                                                                                                                                                                                                                                                                                                                                                                                                                                                                                                                                                                                                                                                                                                                                                                                                                                                                                                                                                                                                                                                                                                                                                                                        |
| siMETTL14#2         | GAACCTGAAATTGGCAATATA                                                                                                                                                                                                                                                                                                                                                                                                                                                                                                                                                                                                                                                                                                                                                                                                                                                                                                                                                                                                                                                                                                                                                                                                                                                                                                                                                                                                                                                                                                                                                                                                                                                                                                                                                                                                                                        |
| siNC/NC             | UUCUCCGAACGUGUCACGUTT                                                                                                                                                                                                                                                                                                                                                                                                                                                                                                                                                                                                                                                                                                                                                                                                                                                                                                                                                                                                                                                                                                                                                                                                                                                                                                                                                                                                                                                                                                                                                                                                                                                                                                                                                                                                                                        |
| pcDNA3.1(+)/IGF2BP2 | <p>ATGATGAACAAGCTTTACATCGGGAACCTGAGCCCCGCCGTCACCGCCGACGA<br/> CCTCCGGCAGCTCTTTGGGGACAGGAAGCTGCCCCTGGCGGGACAGGTCTCT<br/> GCTGAAGTCCGGCTACGCCTTCGTGGACTACCCCGACCAGAAGTGGGCCATC<br/> CGCGCCATCGAGACCCTCTCGGGTAAAGTGAATTGCATGGGAAAATCATGGA<br/> AGTTGATTACTCAGTCTCTAAAAAGCTAAGGAGCAGGAAAATTCAGATTCGAAA<br/> CATCCCTCCTCACCTGCAGTGGGAGGTGTTGGATGGACTTTTGGCTCAATATG<br/> GGACAGTGGAGAATGTGGAACAAGTCAACACAGACACAGAAACCGCCGTTGT<br/> CAACGTCACATATGCAACAAGAGAAGAAGCAAAAATAGCCATGGAGAAGCTAAG<br/> CGGGCATCAGTTTGAGAACTACTCCTTCAAGATTTCTACATCCCGGATGAAGA<br/> GGTGAGCTCCCCTTCGCCCCCTCAGCGAGCCCAGCGTGGGGACCACTCTTCC<br/> CGGGAGCAAGGCCACGCCCTGGGGGCACTTCTCAGGCCAGACAGATTGATT<br/> TCCCGCTGCGGATCCTGGTCCCCACCCAGTTTGTGGTGCCATCATCGGAAAG<br/> GAGGGCTTGACCATAAAGAACATCACTAAGCAGACCCAGTCCCGGGTAGATATC<br/> CATAGAAAAGAGAAGTCTGGAGCTGCAGAGAAGCCTGTCACCATCCATGCCAC<br/> CCCAGAGGGGACTTCTGAAGCATGCCGCATGATTCTTGAAATCATGCAGAAAG<br/> AGGCAGATGAGACCAAAGTCCGAAGAGATTCTCTGAAAATCTTGGCACAC<br/> AATGGCTTGGTTGGAAGACTGATTGGAAAAGAAGGCAGAAATTTGAAGAAAATT<br/> GAACATGAAACAGGGACCAAGATAACAATCTCATCTTTGCAGGATTTGAGCATAT<br/> ACAACCCGAAAGAACCATCACTGTGAAGGGCACAGTTGAGGCCTGTGCCAG<br/> TGCTGAGATAGAGATTATGAAGAAGCTGCGTGAGGCCTTTGAAAATGATATGCT<br/> GGCTGTAAACCAACAAGCCAATCTGATCCCAGGGTTGAACCTCAGCGCACTTG<br/> GCATCTTTTCAACAGGACTGTCCGTGCTATCTCCACCAGCAGGGCCCCGCGGA<br/> GCTCCCCCGCTGCCCCCTACCA<br/> CCCCTTCACTACCCACTCCGGATACTTCTCCAGCCTGTACCCCATCACCAGTT<br/> TGGCCGTTCCCGCATCATCACTCTTATCCAGAGCAGGAGATTGTGAATCTCTT<br/> CATCCCAACCCAGGCTGTGGGCGCCATCATCGGGAAGAAGGGGGCACACATC<br/> AAACAGCTGGCGAGATTCGCCGGAGCCTCTATCAAGATTGCCCTGCGGAAGG<br/> CCCAGACGTCAGCGAAAGGATGGTTCATCATCACCGGGCCACCGGAAGCCCAG<br/> TTCAAGGCCAGGGACGGATCTTTGGGAAACTGAAAGAGGAAAACCTTCTTAA<br/> CCCCAAAGAAGAAGTGAAGCTGGAAGCGCATATCAGAGTGCCCTCTCCACAG<br/> CTGGCCGGGTGATTGGCAAAGGTGGCAAGACCGTGAACGAACTGCAGAACTT</p> |

---

AACCAGTGCAGAAGTCATCGTGCCTCGTGACCAAACGCCAGATGAAAATGAGG  
AAGTGATCGTCAGAATTATCGGGCACTTCTTTGCTAGCCAGACTGCACAGCGCA  
AGATCAGGGAAATTGTACAACAGGTGAAGCAGCAGGAGCAGAAATACCCTCAG  
GGAGTCGCCTCACAGCGCAGCAAGTGA

---



**Supplementary Table 2 Primer sequences**

| Genes                | Forward primer (5'→3')  | Reverse primer (5'→3')  |
|----------------------|-------------------------|-------------------------|
| MYC                  | CATCAGCACAACTACGCAGC    | GCTGGTGCATTTTCGGTTGT    |
| HK2                  | GTGAATCGGAGAGGTCCCAC    | GCTAACTTCGGCCACAGGAT    |
| LDHA                 | ACGTGCATTCCCGATTCTT     | AACAGCACCAACCCCAACAA    |
| PFKM                 | AATCTGCAAGAAAGCAGCGG    | TACCAACTCGAACCACAGCC    |
| PDK1                 | CCAGGGCTGCTTGAGTGTTA    | AGCCATTTACTGCCTGCCAT    |
| SLC2A1               | GGCTTCTCCA ACTGGACCTC   | CCGGAAGCGATCTCATCGAA    |
| IGF2BP2              | AGTGGAATTGCATGGGAAAATCA | CAACGGCGGTTTCTGTGTC     |
| METTL14              | AGTGCCGACAGCATTGGTG     | GGAGCAGAGGTATCATAGGAAGC |
| HPV16 E7             | CCGGACAGAGCCCATTACAA    | TTTGTACGCACAACCGAAGC    |
| HPV18 E6             | GGGCACTATAGAGGCCAGTG    | GTGTTTCTCTGCGTCGTTGG    |
| HPV18 E7             | AACATTTACCAGCCCGACGA    | AGGTCGTCTGCTGAGCTTTC    |
| HPV16 E6             | CAGGAGCGACCCAGAAAGTT    | GCAGTAACTGTTGCTTGCAGT   |
| m <sup>6</sup> A-MYC | GCATACATCCTGTCCGTCCA    | GTCGTTTCCGCAACAAGTCC    |
| β-actin              | CTCCATCCTGGCCTCGCTGT    | GCTGTCACCTTCACCGTTCC    |
| GAPDH                | AATCCCATCACCATCTTCCAG   | AAATGAGCCCCAGCCTTC      |
| CHIP-LDHA            | GGAGGGCAGCACCTTACTTAG   | TCTGGAAAGCGGCTCCTACA    |
| CHIP-HK2             | CCGCAGGTAGTCAGGGATTG    | GAAGGAGAAGGGAACCGCTC    |
| CHIP-PFKM            | TACCCTGGCACTCACCCAAT    | ACTCTTGGAGCTCATGACGG    |
| CHIP-SLC2A1          | GGCTCCTGACTCCTCCGC      | AGACTCCTGCCCGCCTTAC     |
| CHIP-PDK1            | TGGCTGGCGGCGTAAATAA     | ACTTCACAGCATCTTGTCTCAT  |

**Supplementary Table 3. Primary and secondary antibodies and dilution ratio**

---

| Target                                | Company            | Cat.No.    | Dilution ratio |
|---------------------------------------|--------------------|------------|----------------|
| HPV 16 E7                             | biorbyt            | orb635192  | 1:500          |
| HPV 18 E7                             | abcam              | ab100953   | 1:500          |
| HPV 16E6+HPV18 E6                     | abcam              | ab70       | 1:500          |
| IGF2BP2                               | Proteintech,China  | 11601-1-AP | 1:3000         |
| METTL14                               | Proteintech,China  | 26158-1-AP | 1:2000         |
| c-MYC                                 | Proteintech,China  | 10828-1-AP | 1: 2,000       |
| HK2                                   | Proteintech,China  | 22029-1-AP | 1: 5,000       |
| PFKM                                  | Proteintech,China  | 55028-1-AP | 1: 1,000       |
| PDK1                                  | Proteintech,China  | 10026-1-AP | 1: 1,000       |
| GLUT1                                 | Proteintech,China  | 21829-1-AP | 1: 1,000       |
| LDHA                                  | Proteintech,China; | 19987-1-AP | 1: 5,000       |
| $\beta$ -actin                        | Proteintech,China  | 60008-1-Ig | 1: 5,000       |
| anti-mouse HRP<br>secondary antibody  | Immunoway,USA      | RS0001     | 1:5000         |
| anti-rabbit HRP<br>secondary antibody | Immunoway,USA      | RS0002     | 1:5000         |

---
